# Supplementary material for: Metabolic Interplay between the Asian Citrus Psyllid and Its Profftella Symbiont: An Achilles’ Heel of the Citrus Greening Insect Vector
Source: PLoS One. 2015 Nov 18;10(11):e0140826. doi: 10.1371/journal.pone.0140826 (PMC4651294; doi:10.1371/journal.pone.0140826)
Supplement: S7 Table — Average normalized spectral count (N = 3) for protein samples from CLas(+) and CLas(-) D. citri Percoll fractions. Fold difference CLas(+)/CLas(-). Thresholds for protein differential expression: Ttest p-value< = 0.05, fold difference > = 2. (XLSX) [file pone.0140826.s008.xlsx]

## Sheet: Sheet1
S7 Table. D. citri proteins identified as down-regulated in CLas(+) Percoll fractions. Average normalized spectral count (N=3) for protein samples from CLas(+) and CLas(-) D. citri Percoll fractions. Fold difference CLas(+)/CLas(-). Thresholds for protein differential expression: Ttest p-value<=0.05, fold difference >=2.
Protein Description	Protein ID	T-Test (P-Value)	Clas(+) avg	Clas(-) avg	Fold Difference
transitional endoplasmic reticulum ATPase TER94-like [Diaphorina citri]	gi|662216228|ref|XP_008482035.1|	0.04	3.2985	7.0692	0.466602
uncharacterized protein LOC103514874, partial [Diaphorina citri]	gi|662208875|ref|XP_008478013.1|	0.035	6.26193	14.508	0.431619
golgin subfamily A member 6-like protein 22 isoform X1 [Diaphorina citri]	gi|662198027|ref|XP_008472119.1| (+4)	0.0081	6.79163	19.5513	0.347374
Cluster of serine protease inhibitor 3/4-like, partial [Diaphorina citri]	gi|662223633|ref|XP_008486118.1|	0.029	8.13717	41.943	0.194005
Cluster of vitellogenin-A1-like, partial [Diaphorina citri]	gi|662224309|ref|XP_008486488.1| [3]	0.038	115.96	645.033	0.179774
vitellogenin-3-like [Diaphorina citri]	gi|662206226|ref|XP_008476565.1|	0.044	27.6285	155.823	0.177308
leucine-rich repeat-containing protein 48-like [Diaphorina citri]	gi|662205829|ref|XP_008476347.1|	0.017	0.98131	6.05883	0.161964
probable GPI-anchored adhesin-like protein PGA55 [Diaphorina citri]	gi|662199531|ref|XP_008472932.1|	0.015	0.315813	5.17053	0.0610795
uncharacterized protein LOC103504974 [Diaphorina citri]	gi|662189540|ref|XP_008467501.1|	0.043	0.31093	6.81687	0.0456119
dnaJ protein homolog 1 isoform X1 [Diaphorina citri]	gi|662200620|ref|XP_008473529.1| (+1)	0.00079	0	2.38663	0
protein-L-isoaspartate [Diaphorina citri]	gi|662200746|ref|XP_008473599.1|	0.0079	0	2.69977	0
26S protease regulatory subunit 6B [Diaphorina citri]	gi|662211003|ref|XP_008479170.1|	0.013	0	1.9828	0
